# Supplementary material for: Respiratory Syncytial Virus Vaccines: Analysis of the Pre-Marketing Clinical Trial for Immunogenicity in the Population over 50 Years of Age
Source: Preprints.org preprint supplement (doi:10.20944/preprints202402.1158.v1), 2024-02-20
Supplement: Supplementary file 1 [file supplementary]

## Modified PRISMA 2020 flow diagram

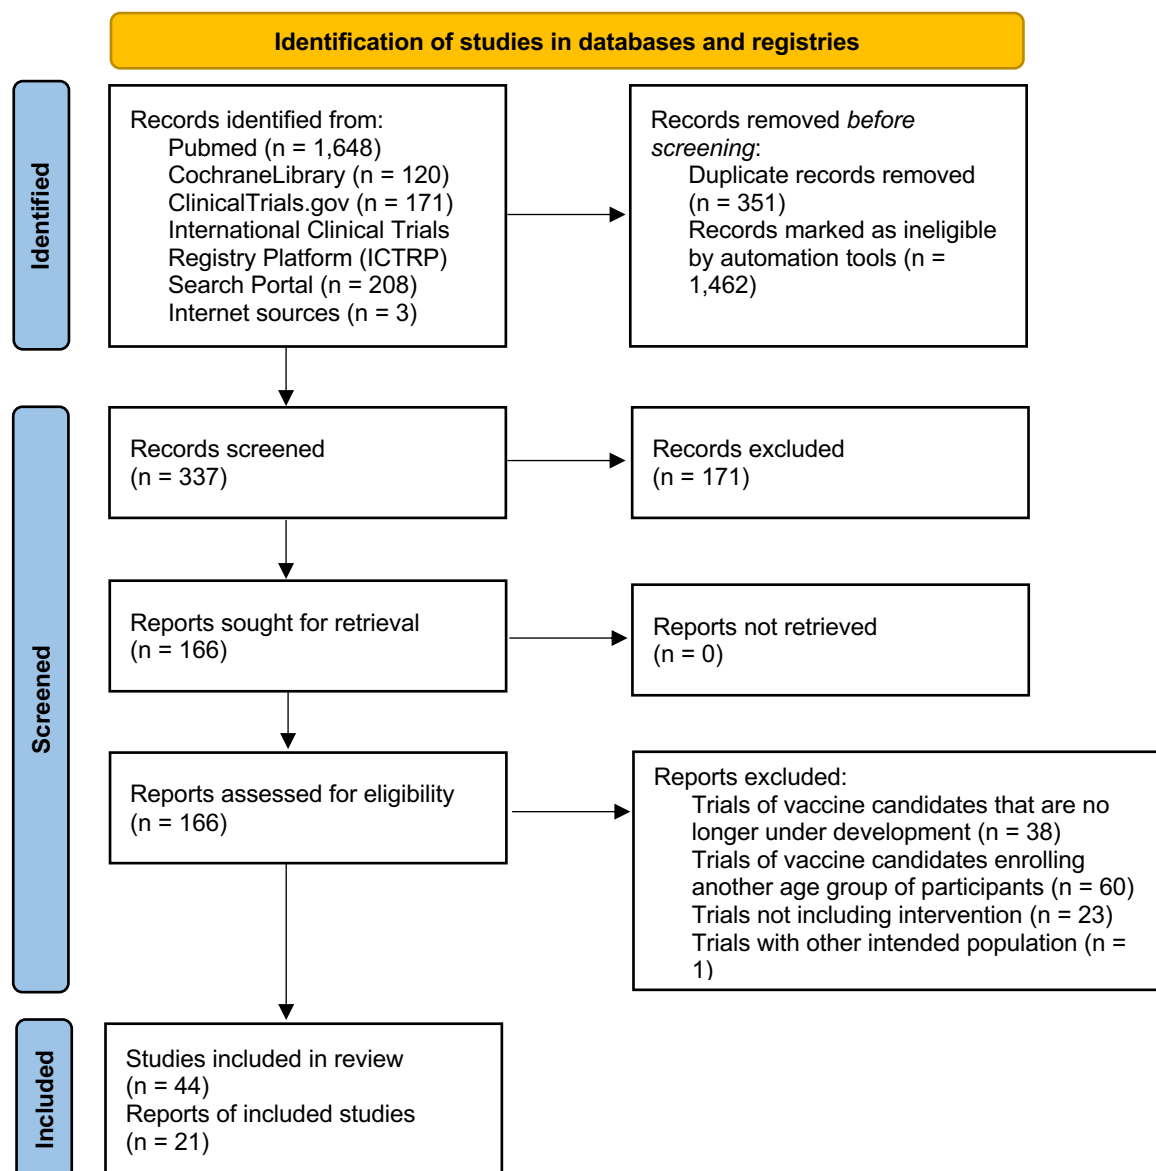

From: Page MJ, McKenzie JE, Bossuyt PM, Boutron I, Hoffmann TC, Mulrow CD, et al. The PRISMA 2020 statement: an updated guideline for reporting systematic reviews. *BMJ* 2021;372:n71. doi: 10.1136/bmj.n71

For more information, visit: <http://www.prisma-statement.org/>
